# Supplementary material for: Recognition of myo-inositol 1,4,5-trisphosphate using a fluorescent imidazolium receptor
Source: Royal Society of Chemistry journal article supplement (doi:10.1039/c2cc33717g), 2012-01-01
Supplement: c2cc33717g.pdf [file c2cc33717g.pdf]

Supporting Information for

## Recognition of *myo*-Inositol 1,4,5-Trisphosphate using Fluorescent Imidazolium Receptor †

Ji Young Jung,<sup>a†</sup> Eun Jin Jun,<sup>b†</sup> Yong-Uk Kwon,<sup>b\*</sup> and Juyoung Yoon<sup>a,b\*</sup>

<sup>a</sup>Department of Bioinspired Science (WCU), Ewha Womans University, Seoul 120-750, Korea

<sup>b</sup>Department of Chemistry and Nano Science, Ewha Womans University, Seoul 120-750, Korea

[jyoon@ewha.ac.kr](mailto:jyoon@ewha.ac.kr); [yukwon@ewha.ac.kr](mailto:yukwon@ewha.ac.kr)

|                 |         |
|-----------------|---------|
| Figure S1 ..... | S4 page |
| Figure S2 ..... | S4 page |
| Figure S3 ..... | S5 page |
| Figure S4 ..... | S5 page |
| Figure S5.....  | S6 page |
| Figure S6.....  | S6 page |
| Figure S7.....  | S7 page |
| Figure S8.....  | S7 page |

## Experimental

### 1. General methods

Unless otherwise noted, materials were obtained from commercial suppliers and were used without further purification. Thin layer chromatography (TLC) was carried out using Merck 60 F<sub>254</sub> plates with thickness of 0.25 mm. Preparative TLC was performed using Merck 60 F<sub>254</sub> plates with the thickness of 1 mm.

Melting points were measured using a Büchi 530 melting point apparatus. <sup>1</sup>H NMR and <sup>13</sup>C NMR spectra were recorded using Bruker 250 MHz, 300 MHz or Varian 500 MHz. Chemical shifts were given in ppm and coupling constants (*J*) in Hz. Mass spectra were obtained using a JMS-HX 110A/110A Tandem Mass Spectrometer (JEOL). UV absorption spectra were obtained on UVIKON 933 Double Beam UV/VIS Spectrometer. Fluorescence emission spectra were obtained using RF-5301/PC Spectrofluorophotometer (Shimadzu).

### 2. Synthesis

#### **Synthesis of 1-((pyren-3-yl)methyl)-1H-imidazole 3** (*Tetrahedron Letter*, 46(39), 6617-20, 2005)

NaH (36.7mg, 0.92mmol, 60% in mineral oil) was added to a mixture of imidazole (57mg, 0.84mmol) in THF (20mL) at 0°C. After the reaction mixture had been stirred for 20min at 0°C, 1-bromomethylpyrene (200mg, 0.68mmol) was added. After additional stirring for 1h at room temperature, water (50mL) was added to the reaction mixture and the mixture extracted with CHCl<sub>3</sub>. The organic layer was separated, dried with anhydrous magnesium sulfate, and concentrated under reduced pressure. Purification by flash chromatography on silica gel (Hexane:EA=1:2) afforded **2** (142mg, 74.3%) as a pale-yellow solid. <sup>1</sup>H NMR (CD<sub>3</sub>CN, 250 MHz) : δ 8.34 (d, *J* = 3.35 Hz, 2H), 8.30-8.24 (m, 3H), 8.17-8.10 (m, 3H), 7.85 (d, *J* = 7.82 Hz,

1H), 7.68 (s, 1H), 7.08 (s, 1H), 6.96 (s, 1H), 5.93 (s, 2H).  $^{13}\text{C}$  NMR ( $\text{CD}_3\text{CN}$ , 62.5 MHz) :  $\delta$  137.54, 131.36, 131.24, 130.62, 128.70, 128.32, 127.70, 127.31, 126.78, 126.45, 125.69, 125.54, 125.09, 122.25, 119.64, 48.13. HRMS (FAB) calcd for  $\text{C}_{20}\text{H}_{15}\text{N}_2$   $[\text{M}+\text{H}]^+$  283.1157; found 283.1232.

### Synthesis of 1

A mixture of **3** (263mg, 0.93mmol) and 1,2,4,5-tetrakis(bromomethyl)benzene (100mg, 0.22mmol) in acetonitrile (10mL) was heated at reflux for 24h under  $\text{N}_2$ . After cooling to room temperature, the precipitate was filtered and washed with cold  $\text{CH}_2\text{Cl}_2$  to give **1** as a white solid (320mg, 91%). m.p. decompose.  $^1\text{H}$  NMR ( $\text{D}_2\text{O}$ , 250 MHz) :  $\delta$  9.45 (s, 4H), 8.43 (d,  $J = 9.29$  Hz, 4H), 8.33-8.19 (m, 20H), 8.14 (s, 4H), 8.10-8.03 (m, 8H), 7.75 (s, 4H), 7.66 (s, 4H), 7.44 (s, 2H), 6.21 (s, 8H), 5.54 (s, 8H).  $^{13}\text{C}$  NMR ( $\text{D}_2\text{O}$ , 62.5 MHz) :  $\delta$  137.47, 134.95, 133.18, 132.14, 131.32, 130.72, 129.47, 129.22, 128.88, 128.54, 127.86, 127.74, 127.35, 126.72, 126.45, 125.83, 124.71, 124.27, 123.51, 123.05, 50.83, 49.53. HRMS (FAB) calcd for  $\text{C}_{58}\text{H}_{50}\text{Br}_3\text{N}_8$   $[\text{M}-\text{Br}]^+$  1495.2955; found 1495.2957.

### Synthesis of 2

A mixture of **3** (200mg, 0.71mmol) and 1,3,5-tris(bromomethyl)-2,4,6-triethylbenzene (89.3mg, 0.20mmol) in acetonitrile (10mL) was heated at reflux for 24h under  $\text{N}_2$ . After cooling to room temperature, the precipitate was filtered and washed with cold  $\text{CH}_2\text{Cl}_2$  to give **2** as a yellow solid (225mg, 88%).  $^1\text{H}$  NMR ( $\text{DMSO}-d_6$ , 300 MHz) :  $\delta$  9.83 (s, 3H), 8.49-8.11 (m, 27H), 7.93 (m, 6H), 6.35 (s, 6H), 5.56 (s, 6H), 2.67 (d,  $J = 7.2$  Hz, 6H), 0.85 (t, 9H).  $^{13}\text{C}$  NMR ( $\text{DMSO}-d_6$ , 500 MHz) :  $\delta$  148.49, 136.51, 131.96, 131.30, 130.66, 129.43, 129.11, 129.04, 128.74, 128.47, 128.05, 127.83, 127.22, 126.60, 126.38, 125.73, 124.67, 124.25, 124.20, 123.55, 123.07, 50.53, 47.75, 23.67, 16.16. HRMS (FAB) calcd for  $\text{C}_{75}\text{H}_{63}\text{Br}_2\text{N}_6$   $[\text{M}-\text{Br}]^+$  1205.3475; found 1205.3477.

### 3. Fluorescent study

Stock solutions (1 mM) of  $\text{IP}_1$ ,  $\text{IP}_2$ ,  $\text{IP}_3$ ,  $\text{IP}_4$ ,  $\text{IP}_5$ ,  $\text{IP}_6$ , *scyllo*- $\text{IP}_3$ , PPI, and ATP in doubly distilled water were prepared. Stock solution of host **1** (0.1 mM) was also prepared in DMSO. Test solutions were prepared by placing 300  $\mu\text{L}$  of the probe stock solution into a test tube, adding an appropriate aliquot of each stock, and diluting the solution to 3 mL with DMSO-HEPES buffer (0.02 M, pH 7.4) (1:9, v/v).



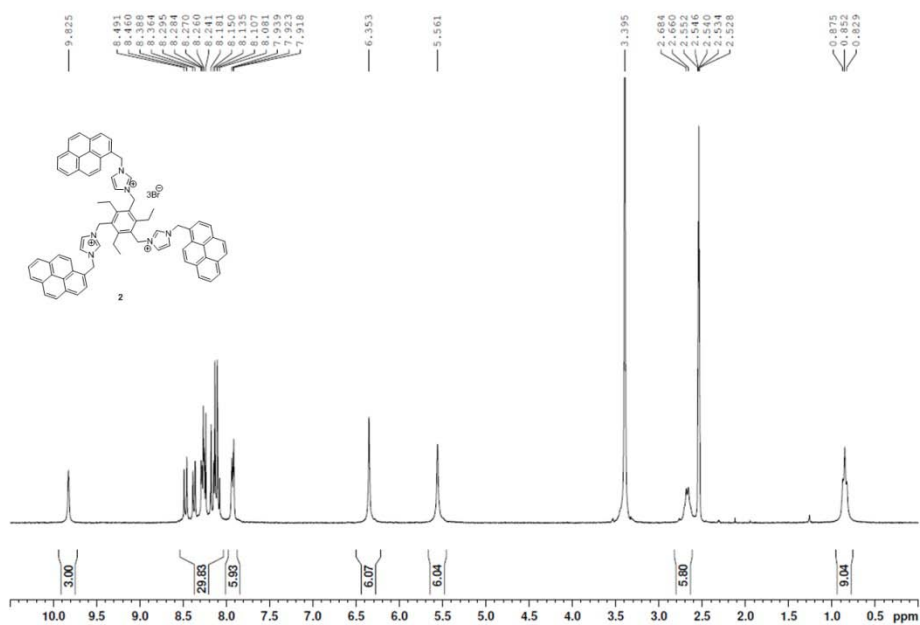

**Fig. S3.**  $^1\text{H}$  NMR (300 MHz) of compound **2** in  $\text{DMSO-}d_6$ .

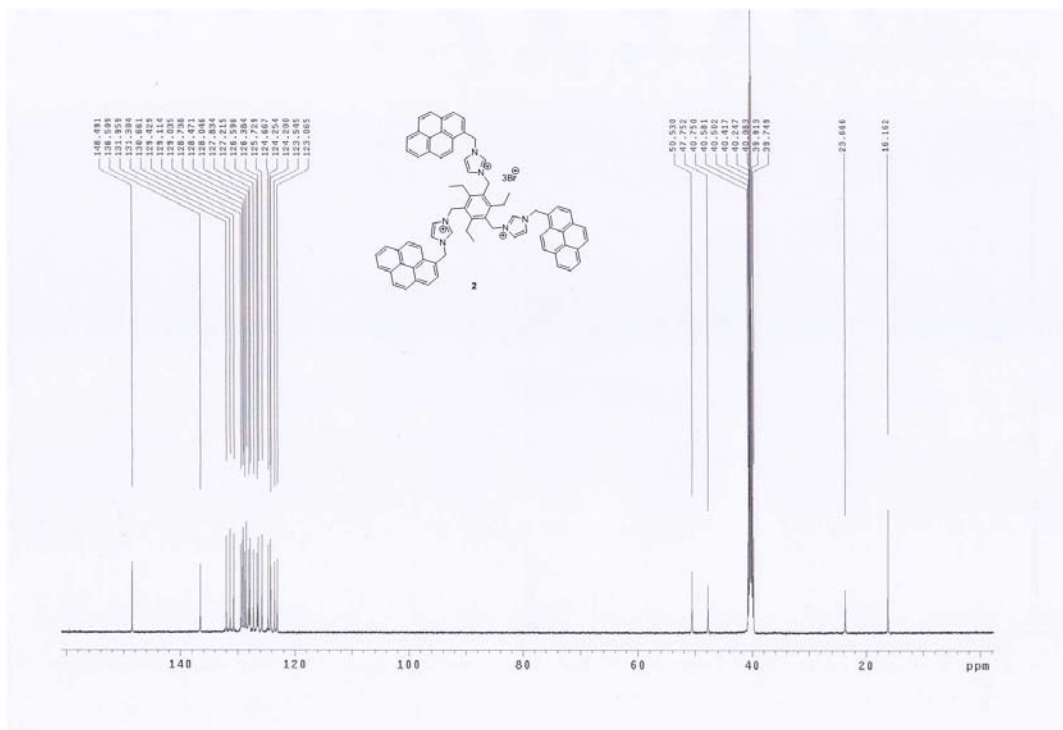

**Fig. S4.**  $^{13}\text{C}$  NMR (300 MHz) of compound **2** in  $\text{DMSO-}d_6$ .

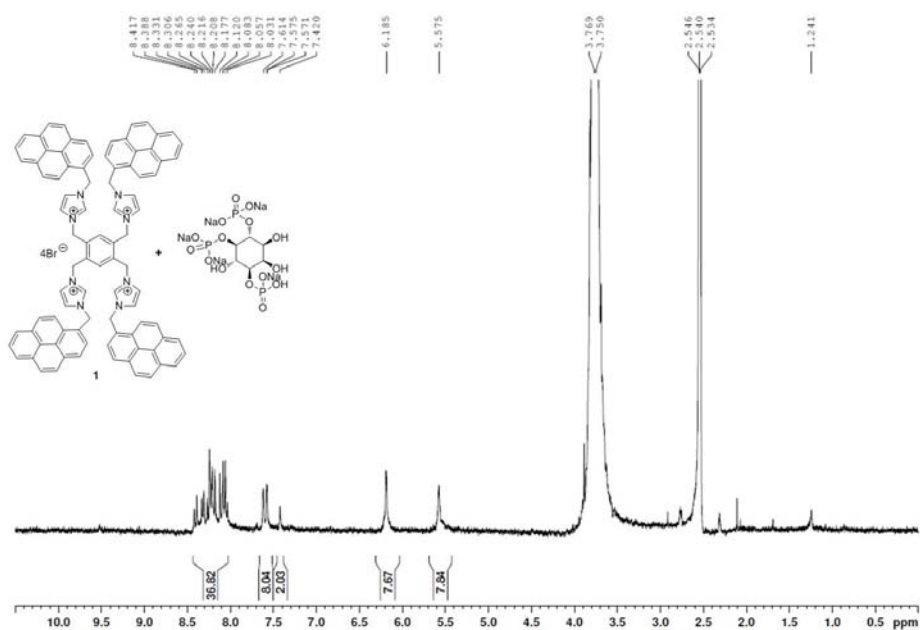

**Fig. S5.** <sup>1</sup>H NMR (300 MHz) of compound **1** with IP<sub>3</sub> in DMSO-*d*<sub>6</sub>-D<sub>2</sub>O (9:1, v/v).

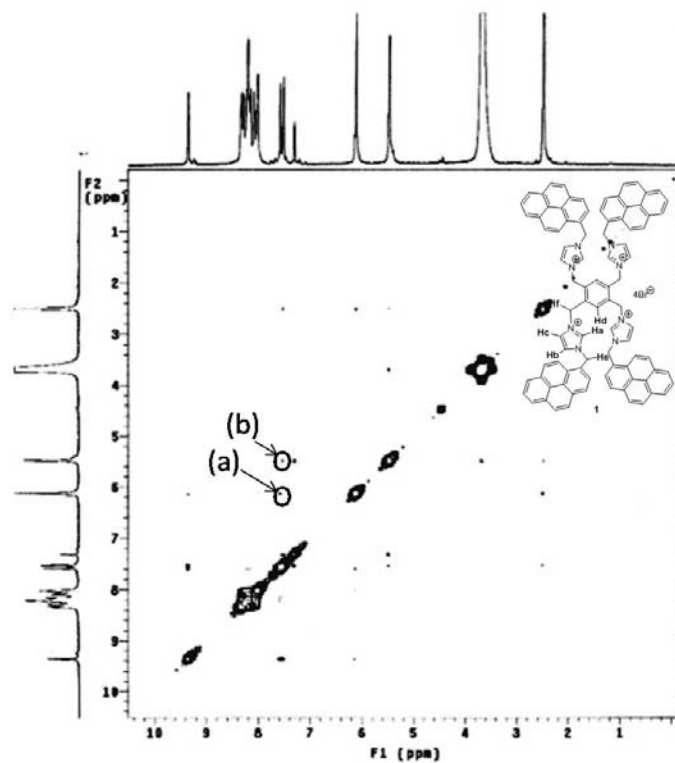

**Fig. S6.** Partial 2D-COSY NMR spectra of **1** in DMSO-*d*<sub>6</sub>-D<sub>2</sub>O (9:1, v/v) cross peak **A** between Hb and He(a), cross peak **B** between Hc and Hf(b).

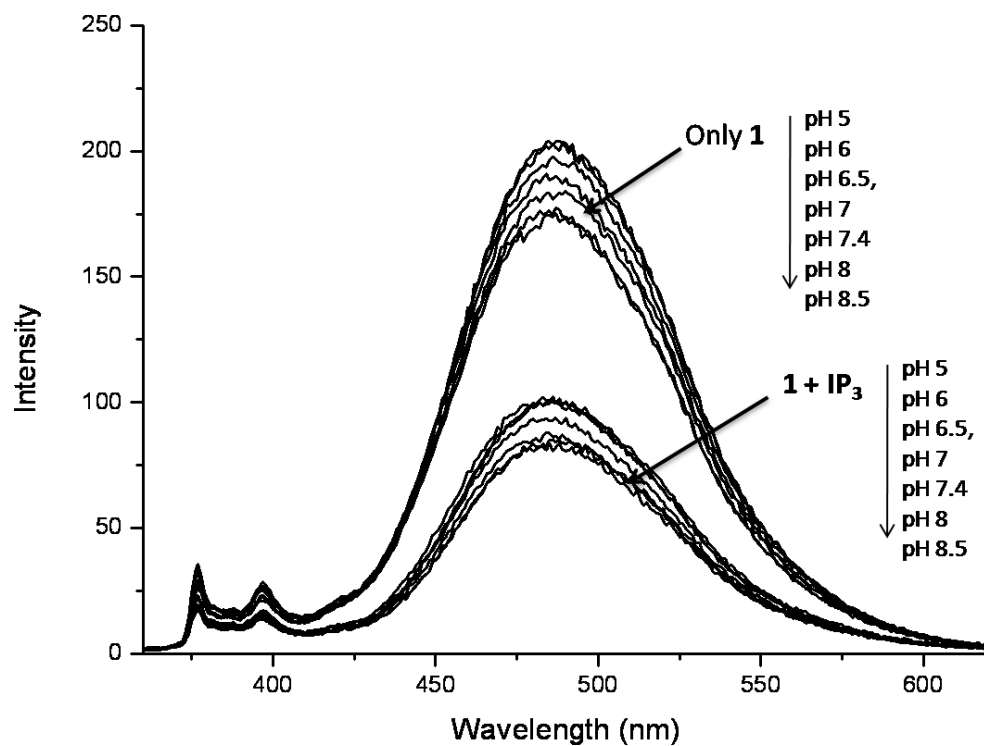

**Fig. S7.** Fluorescent changes of **1** ( $1 \times 10^{-5}$  M, DMSO-HEPES buffer (0.02 M, pH 7.4) (1: 9, v/v) and **1**+IP<sub>3</sub>(2.0 equiv.) at different pHs (excitation at 340 nm).

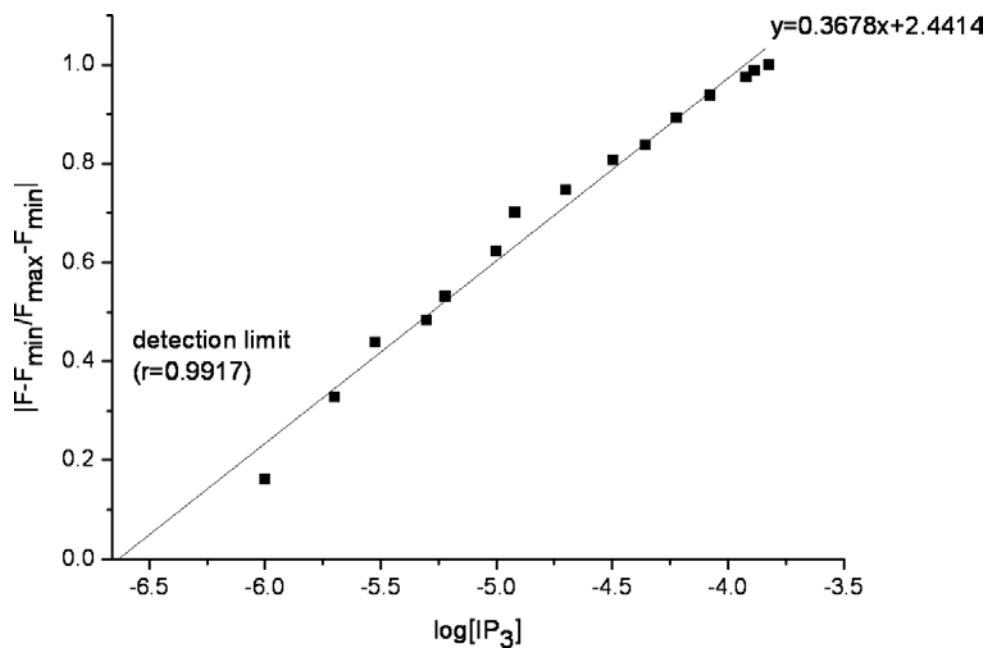

**Fig. S8.** Normalized fluorescence responses of **1** ( $1 \times 10^{-5}$  M) to changing IP<sub>3</sub> concentrations in DMSO-HEPES buffer (0.02 M, pH = 7.4) (1:9, v/v).
